# Supplementary material for: An accurate vibrational signature in halogen bonded molecular crystals
Source: Royal Society of Chemistry journal article supplement (doi:10.1039/d2cp01336c), 2022-01-01
Supplement: d2cp01336c1.pdf [file d2cp01336c1.pdf]

## An accurate vibrational signature in halogen bonded molecular crystals

### Figures

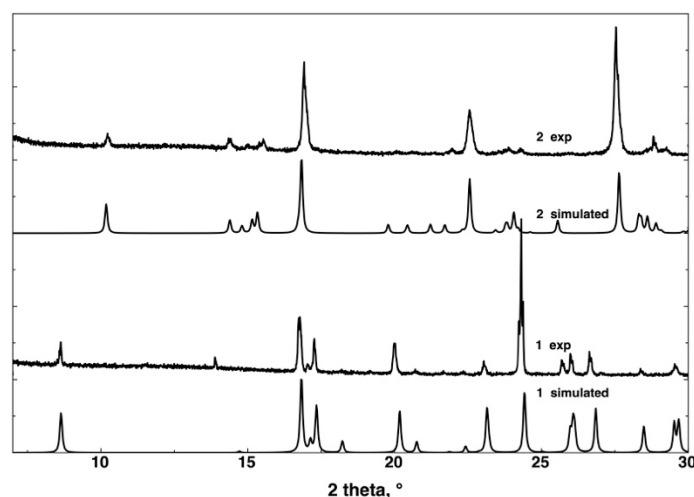

Figure S1: PXRD diagram simulated and experimental for the 1D structure of **1**<sup>1</sup> and **2**.<sup>2</sup>

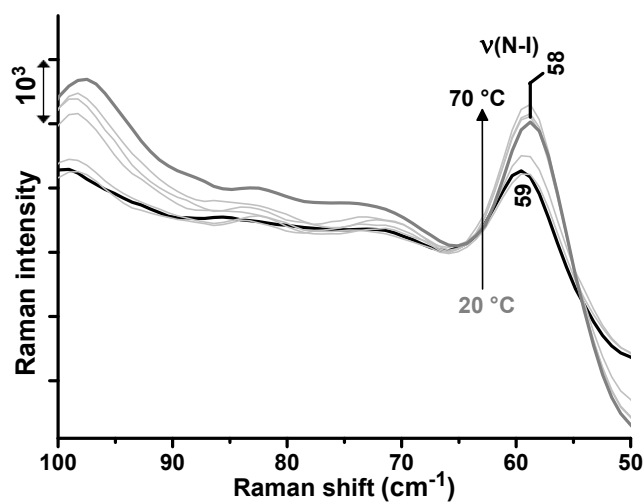

Figure S2: Temperature dependence of the halogen bonding band of **1** from 20 to 70 °C. This enlarged view of the spectral range from 100 to 50 cm<sup>-1</sup> shows the  $\nu(\text{N-I})$  vibrational mode corresponding to the band in Raman spectrum of **1** in Figure 2A.

1 D. Cinčić, T. Friščić, W. Jones, Isostructural Materials Achieved by Using Structurally Equivalent Donors and Acceptors in Halogen-Bonded Cocrystals. *Chem. Eur. J.* **2008**, *14*, 747-753.

2 P. Ravat, S. Seetha Lekshmi, S. N. Biswas, P. Nandy, S. Varughese, Equivalence of Ethylene and Azo-Bridges in the Modular Design of Molecular Complexes: Role of Weak Interactions. *Cryst. Growth Des.* **2015**, *15*, 2389-2401.

## Crystallographic data

|                                                        | <b>1<sup>1</sup></b>                                                                         | <b>1</b>                                                                                     | <b>2<sup>2</sup></b>                                                                         |
|--------------------------------------------------------|----------------------------------------------------------------------------------------------|----------------------------------------------------------------------------------------------|----------------------------------------------------------------------------------------------|
| CCDC N <sup>o</sup>                                    | 649670                                                                                       | 2169122 <sup>a</sup>                                                                         | 742922                                                                                       |
| CCDC Refcode                                           | DIVCUH                                                                                       |                                                                                              | BULKEA                                                                                       |
| Empirical formula                                      | C <sub>4</sub> H <sub>10</sub> N <sub>2</sub> , C <sub>6</sub> F <sub>4</sub> I <sub>2</sub> | C <sub>4</sub> H <sub>10</sub> N <sub>2</sub> , C <sub>6</sub> F <sub>4</sub> I <sub>2</sub> | C <sub>10</sub> H <sub>8</sub> N <sub>4</sub> , C <sub>6</sub> F <sub>4</sub> I <sub>2</sub> |
| Formula weight                                         | 488.00                                                                                       | 488.00                                                                                       | 586.06                                                                                       |
| Crystal system                                         | Triclinic                                                                                    | Triclinic                                                                                    | Triclinic                                                                                    |
| Space group                                            | <i>P</i> -1                                                                                  | <i>P</i> -1                                                                                  | <i>P</i> -1                                                                                  |
| <i>a</i> /Å                                            | 5.2777(2)                                                                                    | 5.2774(2)                                                                                    | 6.414(4)                                                                                     |
| <i>b</i> /Å                                            | 6.0948(2)                                                                                    | 6.0924(2)                                                                                    | 8.358(5)                                                                                     |
| <i>c</i> /Å                                            | 10.3019(3)                                                                                   | 10.3058(4)                                                                                   | 9.202(6)                                                                                     |
| $\alpha$ /°                                            | 90.851(2)                                                                                    | 90.853(2)                                                                                    | 82.982(9)                                                                                    |
| $\beta$ /°                                             | 96.934(2)                                                                                    | 96.872(2)                                                                                    | 70.979(9)                                                                                    |
| $\gamma$ /°                                            | 99.1130(10)                                                                                  | 99.081(2) <sup>o</sup>                                                                       | 78.678(9)                                                                                    |
| Volume/Å <sup>3</sup>                                  | 324.605(19)                                                                                  | 324.66(2)                                                                                    | 456.4(5)                                                                                     |
| <i>Z</i>                                               | 1                                                                                            | 1                                                                                            | 1                                                                                            |
| $\rho_{\text{calc}}$ /cm <sup>3</sup>                  | 2.496                                                                                        | 2.496                                                                                        | 2.132                                                                                        |
| $\mu$ /mm <sup>-1</sup>                                | 4.876                                                                                        | 4.875                                                                                        | 3.491                                                                                        |
| F(000)                                                 | 226                                                                                          | 226                                                                                          | 274                                                                                          |
| Color                                                  | colorless                                                                                    | colorless                                                                                    | orange                                                                                       |
| T(K)                                                   | 180(2)                                                                                       | 100(1)                                                                                       | 100(1)                                                                                       |
| Wavelength (Å)                                         | 0.71073                                                                                      | 0.71073                                                                                      | 0.71073                                                                                      |
| Temperature (K)                                        | 180                                                                                          | 100                                                                                          | 100                                                                                          |
| 2 $\theta$ range for data collection/°                 | 1.99 to 33.66                                                                                | 3.39 to 30.17                                                                                | 2.35 to 25.56                                                                                |
| Reflections collected                                  | 2551                                                                                         | 1722                                                                                         | 1665                                                                                         |
| Independent reflections                                | 2309                                                                                         | 1722                                                                                         | 1584                                                                                         |
| Goodness-of-fit on F <sup>2</sup>                      | 1.175                                                                                        | 1.108                                                                                        | 1.040                                                                                        |
| Final R indexes [ <i>I</i> >= 2 $\sigma$ ( <i>I</i> )] | R <sub>1</sub> = 0.0298, wR <sub>2</sub> =<br>0.0758                                         | R1 = 0.0172, wR2 =<br>0.0448                                                                 | R <sub>1</sub> = 0.0353, wR <sub>2</sub> =<br>0.0946                                         |
| Final R indexes [all data]                             | R <sub>1</sub> = 0.0375, wR <sub>2</sub> =<br>0.0939                                         | R1 = 0.0176, wR2 =<br>0.0452                                                                 | R <sub>1</sub> = 0.0368, wR <sub>2</sub> =<br>0.0964                                         |
| Largest diff. peak/hole / e Å <sup>-3</sup>            | 1.104/-2.277                                                                                 | 0.819 / -0.758                                                                               | 1.433/-0.933                                                                                 |

**Table S1.** Crystallographic data for **1** and **2** measured at 180 K and 100K respectively. <sup>a</sup> This compound was measured at T = 100K, for comparison with **2**, that was also measured at 100K. **1** was already measured at T = 180K.

## DFT simulation

|                   | TFIB..Piperazine | TFIB..(Piperazine) <sub>2</sub> | TFIB..Azopyridine | TFIB..(Azopyridine) <sub>2</sub> |
|-------------------|------------------|---------------------------------|-------------------|----------------------------------|
| <b>TFIB</b>       |                  |                                 |                   |                                  |
| $r_{CF}$          |                  |                                 |                   |                                  |
| PBE0              | 1.325            | 1.330                           | 1.332             | 1.330                            |
| PBE0-GD3          | 1.325            | 1.331                           | 1.331             | 1.329                            |
| M06               | 1.322            | 1.315                           | 1.328             | 1.326                            |
| $r_{CI}$          |                  |                                 |                   |                                  |
| PBE0              | 2.090            | 2.128                           | 2.125             | 2.113                            |
| PBE0-GD3          | 2.092            | 2.132                           | 2.129             | 2.117                            |
| M06               | 2.095            | 2.129                           | 2.127             | 2.118                            |
| $\theta_{ICC}$    |                  |                                 |                   |                                  |
| PBE0              | 120.5            | 120.7                           | 121.1             | 121.0                            |
| PBE0-GD3          | 120.6            | 120.9                           | 121.0             | 120.9                            |
| M06               | 120.6            | 121.1                           | 121.0             | 120.9                            |
| <b>Piperazine</b> |                  |                                 |                   |                                  |
| $R_{NH}$          |                  |                                 |                   |                                  |
| PBE0              | 1.012            | 1.014                           | 1.013             |                                  |
| PBE0-GD3          | 1.012            | 1.014                           | 1.013             |                                  |
| M06               | 1.014            | 1.016                           | 1.015             |                                  |
| $r_{CN}$          |                  |                                 |                   |                                  |
| PBE0              | 1.455            | 1.463                           | 1.462             |                                  |
| PBE0-GD3          | 1.455            | 1.463                           | 1.462             |                                  |
| M06               | 1.454            | 1.462                           | 1.461             |                                  |
| $\theta_{CNC}$    |                  |                                 |                   |                                  |
| PBE0              | 111.1            | 111.7                           | 111.7             |                                  |
| PBE0-GD3          | 111.1            | 111.9                           | 111.9             |                                  |

|                             |       |              |              |              |
|-----------------------------|-------|--------------|--------------|--------------|
| M06                         | 111.1 | 112.0        | 112.0        |              |
| <hr/>                       |       |              |              |              |
| Azopyridine                 |       |              |              |              |
| $r_{\text{CN}}$             |       |              |              |              |
| PBE0                        | 1.330 |              | 1.330        | 1.330        |
| PBE0-GD3                    | 1.330 |              | 1.330        | 1.335        |
| M06                         | 1.328 |              | 1.334        | 1.334        |
| $\theta_{\text{CNC}}$       |       |              |              |              |
| PBE0                        | 117.2 |              | 118.1        | 118.1        |
| PBE0-GD3                    | 117.2 |              | 118.3        | 118.3        |
| M06                         | 117.4 |              | 118.4        | 118.4        |
| <hr/>                       |       |              |              |              |
| Intermolecular              |       |              |              |              |
| $R_{\text{I}\dots\text{N}}$ |       |              |              |              |
| PBE0                        | 2.836 | 2.866 (3.69) | 2.884 (3.69) | 2.913 (3.69) |
| PBE0-GD3                    | 2.810 | 2.837 (3.69) | 2.856 (3.69) | 2.882        |
| M06                         | 2.839 | 2.864 (3.69) | 2.862 (3.69) | 2.884        |
| $\theta_{\text{INC}}$       |       |              |              |              |
| PBE0                        | 175.9 | 175.9        | 178.5        | 178.9        |
| PBE0-GD3                    | 177.5 | 177.2        | 180.0        | 180.0        |
| M06                         | 176.8 | 176.7        | 179.9        | 179.7        |
| <hr/>                       |       |              |              |              |

The values in brackets are the sum of the Van der Waals radii ( $r_{\text{vdw}}(\text{N})=1.54 \text{ \AA}$  and  $r_{\text{vdw}}(\text{I})=2.15 \text{ \AA}$ )

**Table S2:** Geometrical parameters calculated by DFT for TFBI-Piperazine, TFBI..(Piperazine)<sub>2</sub>, TFBI-diAzopyridine and TFBI..(Azopyridine)<sub>2</sub> complexes.

|                                          | Stretching C-I $\nu_{C-I}$ |                        | Bending C-I $\delta_{C-I}$ |                        | Stretching N-I (XB) $\nu_{N-I}$ |    |
|------------------------------------------|----------------------------|------------------------|----------------------------|------------------------|---------------------------------|----|
|                                          | Raman                      | IR (cm <sup>-1</sup> ) | Raman                      | IR (cm <sup>-1</sup> ) | Raman                           | IR |
| <b>Experimental</b>                      |                            |                        |                            |                        |                                 |    |
| TFIB                                     | 156                        | 243                    | 142                        | 209                    | -                               | -  |
| <b>1</b>                                 | 144                        | 229                    | 160                        | 213                    | 61                              | 67 |
| <b>2</b>                                 | 149                        | 231                    | 159                        | 210                    | 74                              | 69 |
| <b>Calculated</b>                        |                            |                        |                            |                        |                                 |    |
| TFBI                                     |                            |                        |                            |                        | -                               | -  |
| PBE0                                     | 159 (4)                    | 245 (2)                | 153 (2)                    | 208 (0.5)              |                                 |    |
| PBE0-GD3                                 | 158 (4)                    | 244 (1)                | 153 (2)                    | 208 (0.4)              |                                 |    |
| M06                                      | 157 (3)                    | 243 (1)                | 151 (2)                    | 204 (0.4)              |                                 |    |
| <b>1 TFBI..Piperazine</b>                |                            |                        |                            |                        |                                 |    |
| PBE0                                     | 151 (23)                   | 237 (11)               | 156 (1.5)                  | 212 (0.5)              | 70                              | 70 |
| PBE0-GD3                                 | 152 (21)                   | 237 (12)               | 156 (3.4)                  | 212 (0.5)              | 69                              | 69 |
| M06                                      | 153 (17)                   | 237 (12)               | 157 (1.2)                  | 209 (0.7)              | 73                              | 71 |
| <b>1 TFBI..(Piperazine)<sub>2</sub></b>  |                            |                        |                            |                        |                                 |    |
| PBE0                                     | 149 (56)                   | 230 (38)               | 157 (1)                    | 216 (0.7)              | 55                              | 48 |
| PBE0-GD3                                 | 150 (53)                   | 229 (41)               | 159 (1)                    | 217 (0.7)              | 62                              | 62 |
| M06                                      | 151 (39)                   | 232 (35)               | 158 (1)                    | 214 (0.9)              | 76                              | 76 |
| <b>2 TFBI..Azopyridine</b>               |                            |                        |                            |                        |                                 |    |
| PBE0                                     | 154 (8)                    | 239 (10)               | 157 (2.5)                  | 211 (0.4)              | 49                              | 46 |
| PBE0-GD3                                 | 154 (44)                   | 239 (11)               | 158 (3)                    | 211 (0.4)              | 46                              | 46 |
| M06                                      | 154 (36)                   | 239 (11)               | 158 (2)                    | 208 (0.5)              | 53                              | 54 |
| <b>2 TFBI..(Azopyridine)<sub>2</sub></b> |                            |                        |                            |                        |                                 |    |
| PBE0                                     | 151 (124)                  | 236 (30)               | 159 (3)                    | 215 (0.4)              | 38                              | 51 |
| PBE0-GD3                                 | 152 (130)                  | 235 (32)               | 160 (3)                    | 215 (0.4)              | 52                              | 56 |
| M06                                      | 153 (104)                  | 236 (33)               | 160 (3)                    | 212 (0.5)              | 53                              | 59 |

**Table S3:** Overview on the assignments of the TFIB, **1** and **2** vibrations in the spectral region from 300 to 50  $\text{cm}^{-1}$ . Comparison of the experimental vibrational frequencies (Raman and FIR) with computed frequencies (Intensities) for the fundamentals ( $\nu$ : stretching and  $\delta$ : deformation in  $\text{cm}^{-1}$ ). Intensities are given in brackets for the calculated values.

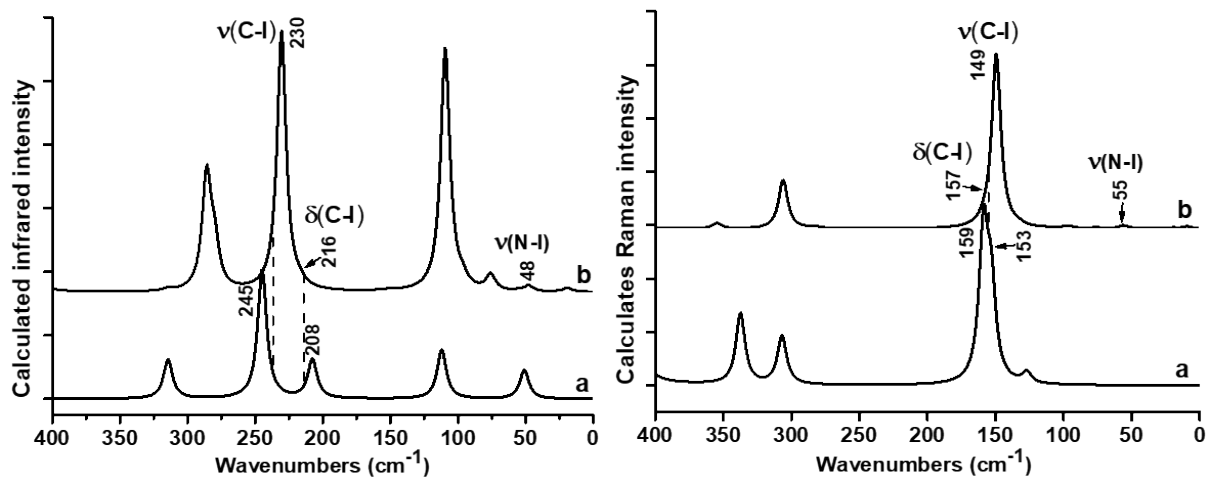

**Figure S3.** Calculated infrared (left) and Raman spectra (right) in the region 400 - 0 cm<sup>-1</sup> for a) TFBI b) 1 TFBI..(Piperazine)<sub>2</sub> compounds.

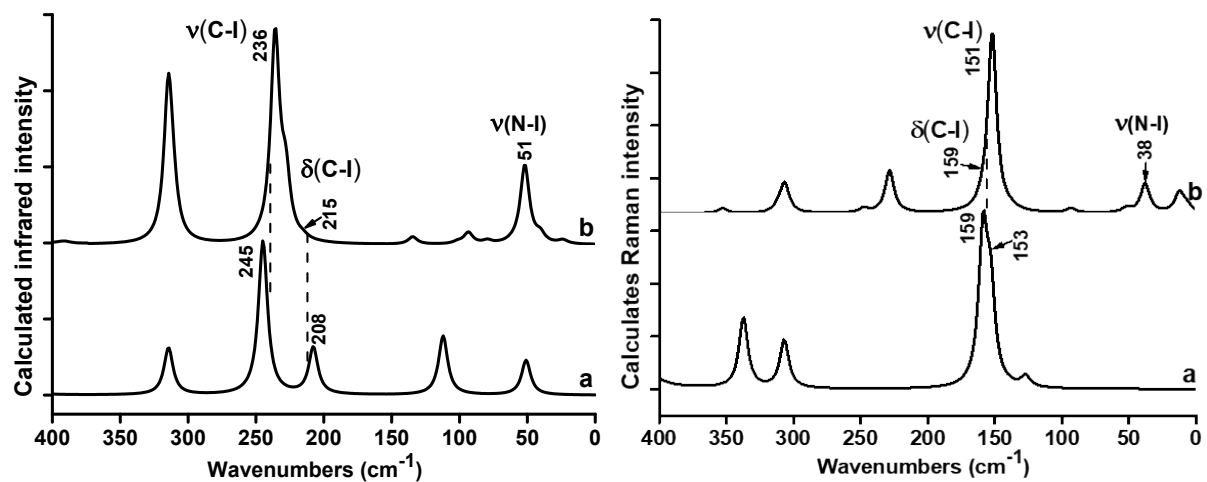

**Figure S4.** Calculated infrared (left) and Raman spectra (right) in the region 400 - 0 cm<sup>-1</sup> of a) TFBI b) 2 TFBI..(Azopyridine)<sub>2</sub> compounds.
